# Supplementary material for: Targeting PRMT3 impairs methylation and oligomerization of HSP60 to boost anti-tumor immunity by activating cGAS/STING signaling
Source: PubMed Central journal article supplement (PMC11387718; doi:10.1038/s41467-024-52170-3), 2024-09-10
Supplement: 41467_2024_52170_MOESM3_ESM.pdf [file 41467_2024_52170_MOESM3_ESM.pdf]

## Description of Additional Supplementary Files

**File Name:** Supplementary Data 1

**Description:** Proteins detected by IP in HCC cell lysates followed mass spectrometry.

**File Name:** Supplementary Data 2

**Description:** Protein modifications detected by IP in HCC cell lysates followed mass spectrometry.
